# Supplementary material for: Whole System Data Integration for Condition Assessments of Climate Change Impacts: An Example in High-Mountain Ecosystems in Rila (Bulgaria)
Source: MDPI journal article supplement (doi:10.3390/d14040240), 2022-03-25
Supplement: s1 [file s1]

## Supplementary materials

### Contents

|                                                                      |    |
|----------------------------------------------------------------------|----|
| Supplementary materials                                              | 1  |
| 1. Data integration                                                  | 1  |
| 2. Data collection                                                   | 4  |
| 3. Data analysis: single data sources                                | 6  |
| 4. Data analysis: combining satellite and climate data               | 10 |
| 5. Data cross-validation: NDGI as means to identify outliers         | 15 |
| 6. Statistical processing of combined data: growth by ecosystem type | 18 |

### 1. Data integration

**Table S1.** Whole system condition indicator set grouped by subsystem of the ecosystem as defined in Methodological Framework, 2017

| Ecosystem condition indicators and parameters as grouped in the Bulgarian adaptation of the Whole System approach |                                                      |
|-------------------------------------------------------------------------------------------------------------------|------------------------------------------------------|
| Ecosystem structure                                                                                               | Ecosystem processes                                  |
| <b>Biotic Heterogeneity</b>                                                                                       | <b>Energy budget</b>                                 |
| Plant diversity                                                                                                   | Energy balance (capture, storage)                    |
| Vegetation cover                                                                                                  | Entropy production                                   |
| Plant species richness                                                                                            | Metabolic efficiency                                 |
| Animal diversity                                                                                                  | Other energy budget indicators                       |
| Animal species richness                                                                                           | <b>Matter budget</b>                                 |
| Fungal diversity                                                                                                  | Matter balance (input, output)                       |
| Red list species                                                                                                  | Matter storage                                       |
| Red list animal species                                                                                           | Efficiency measures                                  |
| Red list plant species                                                                                            | Element concentrations (other conditional variables) |
| Invasive species                                                                                                  | Element concentrations (other state variables)       |
| Invasive plant species                                                                                            | <b>Water budget</b>                                  |
| Ecosystem presence                                                                                                | Water balance (input, output)                        |
| Habitat diversity                                                                                                 | Water storage                                        |
| Other biotic heterogeneity indicators (naturalness etc.)                                                          | Efficiency measures                                  |
| <b>Abiotic heterogeneity</b>                                                                                      | Other conditional indicators                         |
| Air heterogeneity                                                                                                 | Other state indicators                               |
| Hydrological heterogeneity                                                                                        |                                                      |
| Soil quality                                                                                                      |                                                      |
| Soil heterogeneity                                                                                                |                                                      |
| Soil erosion risk                                                                                                 |                                                      |

|                                                                  |  |
|------------------------------------------------------------------|--|
| Soil organic matter                                              |  |
| Concentration of<br>pollutants in soil from<br>surrounding areas |  |
| Geomorphological heterogeneity                                   |  |
| Disturbance regime                                               |  |
| Other abiotic heterogeneity<br>indicators                        |  |

**Table S2.** Cross-reference of indicators between ecosystem types - Biodiversity subsystem

| Ecosystem condition indicators as grouped in the Methodological Framework (2017)               | Indicator is used for ecosystem types |                                           |                                                    |                                           |                                        |
|------------------------------------------------------------------------------------------------|---------------------------------------|-------------------------------------------|----------------------------------------------------|-------------------------------------------|----------------------------------------|
|                                                                                                | Grassland (Apostolova et al., 2017)   | Heathland and Shrubs (Velev et al., 2017) | Sparsely Vegetated Areas (Sopotlieva et al., 2017) | Woodland and forest (Kostov et al., 2017) | Rivers and Lakes (Uzunov et al., 2017) |
| <b>Ecosystem structure</b>                                                                     |                                       |                                           |                                                    |                                           |                                        |
| <b>Biotic Heterogeneity</b>                                                                    |                                       |                                           |                                                    |                                           |                                        |
| Vegetation cover                                                                               | Yes                                   | Yes                                       | Yes                                                |                                           |                                        |
| Habitat diversity                                                                              |                                       |                                           |                                                    | Yes                                       | Yes                                    |
| Plant diversity or plant species richness                                                      | Yes                                   | Yes                                       | Yes                                                | Yes                                       | Yes                                    |
| Animal diversity or animal species richness                                                    | Yes                                   | Yes                                       | Yes                                                | Yes                                       | Yes                                    |
| Fungal diversity                                                                               | Yes                                   |                                           |                                                    |                                           |                                        |
| Invasive species (not differentiated by kingdom or differentiated by plant and animal species) | Yes                                   | Yes                                       | Yes                                                | Yes                                       | Yes                                    |
| Red list species (not differentiated by kingdom or differentiated by plant and animal species) | Yes                                   | Yes                                       | Yes                                                | Yes                                       |                                        |
| Other biotic heterogeneity indicators (naturalness etc.)                                       | Yes                                   |                                           |                                                    | Yes                                       | Yes                                    |

**Table S3.** Measurement methods for ecosystem parameters according to the Whole system approach as per the Bulgarian Methodological Framework for mapping and assessment of ecosystem condition and services (Methodological Framework, 2017). Preferred single methods are marked in **bold**; other methods are listed in order of increasing uncertainty (estimated basing on observation method and geolocation uncertainty). Models (in *italic*) are only applicable for areas with sufficient and consistent data<sup>1</sup>.

| Ecosystem condition indicators as grouped in the Bulgarian adaptation of the Whole System approach | Data source(s)                                                                                                                                             |
|----------------------------------------------------------------------------------------------------|------------------------------------------------------------------------------------------------------------------------------------------------------------|
| <b>Ecosystem structure</b>                                                                         |                                                                                                                                                            |
| <b>Biotic Heterogeneity</b>                                                                        | <b>Field observations</b><br><br>Remote sensing (some indicators only)<br><br>eDNA<br><br>Literature<br><br><i>Models and/or data combinations between</i> |
| Plant diversity                                                                                    |                                                                                                                                                            |
| Vegetation cover                                                                                   |                                                                                                                                                            |
| Plant species richness                                                                             |                                                                                                                                                            |
| Animal diversity                                                                                   |                                                                                                                                                            |
| Animal species richness                                                                            |                                                                                                                                                            |
| Fungal diversity                                                                                   |                                                                                                                                                            |

<sup>1</sup> Currently, in Bulgaria there are no systematic measurements of the indicators of the “Ecosystem process” group since the corresponding equipment is yet to be procured. Introducing flux measurements is planned as part of the upgrade of the Bulgarian Long-Term Ecosystem Research Infrastructure.

|                                                            |                                                                                                                                                                                                                                                                      |
|------------------------------------------------------------|----------------------------------------------------------------------------------------------------------------------------------------------------------------------------------------------------------------------------------------------------------------------|
| Red list species                                           | <i>remote sensing and the other data sources</i>                                                                                                                                                                                                                     |
| Red list animal species                                    |                                                                                                                                                                                                                                                                      |
| Red list plant species                                     |                                                                                                                                                                                                                                                                      |
| Invasive species                                           |                                                                                                                                                                                                                                                                      |
| Invasive plant species                                     |                                                                                                                                                                                                                                                                      |
| Ecosystem presence                                         |                                                                                                                                                                                                                                                                      |
| Habitat diversity                                          |                                                                                                                                                                                                                                                                      |
| Other biotic heterogeneity indicators (naturalness etc.)   |                                                                                                                                                                                                                                                                      |
| <b>Abiotic heterogeneity</b>                               | <b>Field observations</b><br><br>Data from large scale air, water, soil monitoring and climate models<br><br>Remote sensing (some indicators only)<br><br>Literature<br><br><i>Models and/or data combinations between remote sensing and the other data sources</i> |
| Air heterogeneity                                          |                                                                                                                                                                                                                                                                      |
| Hydrological heterogeneity                                 |                                                                                                                                                                                                                                                                      |
| Soil quality                                               |                                                                                                                                                                                                                                                                      |
| Soil heterogeneity                                         |                                                                                                                                                                                                                                                                      |
| Soil erosion risk                                          |                                                                                                                                                                                                                                                                      |
| Soil organic matter                                        |                                                                                                                                                                                                                                                                      |
| Concentration of pollutants in soil from surrounding areas |                                                                                                                                                                                                                                                                      |
| Geomorphological heterogeneity                             |                                                                                                                                                                                                                                                                      |
| Disturbance regime                                         |                                                                                                                                                                                                                                                                      |
| Other abiotic heterogeneity indicators                     |                                                                                                                                                                                                                                                                      |
| <b>Ecosystem processes</b>                                 |                                                                                                                                                                                                                                                                      |
| <b>Energy budget</b>                                       | <b>Remote sensing</b><br><br>Field data collected in suitably equipped observatories<br><br><i>Models and/or data combinations between remote sensing and the other data sources, in particular field observations on fluxes</i>                                     |
| Energy balance (capture, storage)                          |                                                                                                                                                                                                                                                                      |
| Entropy production                                         |                                                                                                                                                                                                                                                                      |
| Metabolic efficiency                                       |                                                                                                                                                                                                                                                                      |
| Other energy budget indicators                             |                                                                                                                                                                                                                                                                      |
| <b>Matter budget</b>                                       |                                                                                                                                                                                                                                                                      |
| Matter balance (input, output)                             |                                                                                                                                                                                                                                                                      |
| Matter storage                                             |                                                                                                                                                                                                                                                                      |
| Efficiency measures                                        |                                                                                                                                                                                                                                                                      |
| Element concentrations (other conditional variables)       |                                                                                                                                                                                                                                                                      |
| Element concentrations (other state variables)             |                                                                                                                                                                                                                                                                      |
| <b>Water budget</b>                                        |                                                                                                                                                                                                                                                                      |
| Water balance (input, output)                              |                                                                                                                                                                                                                                                                      |
| Water storage                                              |                                                                                                                                                                                                                                                                      |
| Efficiency measures                                        |                                                                                                                                                                                                                                                                      |
| Other conditional indicators                               |                                                                                                                                                                                                                                                                      |

## 2. Data collection

**Table S4.** Satellite data sources. Note that Landsat images before Landsat 7 TM have a coarser grid

| No | Date       | Sensor     | NDWI availability                                                                |
|----|------------|------------|----------------------------------------------------------------------------------|
| 1  | 22/08/1977 | Landsat    | Not available                                                                    |
| 2  | 23/05/1984 |            | Not available                                                                    |
| 3  | 26/07/1984 |            | Not available                                                                    |
| 4  | 27/06/1985 |            | Not available                                                                    |
| 5  | 22/05/1986 |            | Available                                                                        |
| 6  | 04/10/1986 |            | Not available                                                                    |
| 7  | 03/07/1987 |            | Not available                                                                    |
| 8  | 11/07/1990 |            | Not available                                                                    |
| 9  | 02/09/1992 |            | Available but not calculated/ NDVI verified with NDGI for the period 1985 - 1994 |
| 10 | 29/06/1994 |            | Not available                                                                    |
| 11 | 28/06/2000 |            | Available                                                                        |
| 12 | 13/06/2009 |            | Available                                                                        |
| 13 | 15/07/2009 |            | Available                                                                        |
| 14 | 22/08/2011 |            | Available                                                                        |
| 15 | 23/09/2011 |            | Available                                                                        |
| 16 | 09/09/2012 |            | Not available                                                                    |
| 17 | 02/08/2016 | Sentinel 2 | Available                                                                        |
| 18 | 02/05/2017 | Landsat    | Available                                                                        |
| 19 | 02/08/2017 | Sentinel 2 | Available                                                                        |
| 20 | 27/08/2017 |            | Available                                                                        |
| 21 | 26/10/2017 |            | Available                                                                        |
| 22 | 03/04/2018 | Landsat    | Available                                                                        |
| 23 | 06/10/2018 | Sentinel 2 | Available                                                                        |
| 24 | 16/10/2018 |            | Available                                                                        |
| 25 | 26/10/2018 |            | Available                                                                        |
| 26 | 24/04/2019 |            | Available                                                                        |
| 27 | 13/06/2019 |            | Available                                                                        |
| 28 | 23/06/2019 |            | Available                                                                        |
| 29 | 03/07/2019 |            | Available                                                                        |
| 30 | 12/08/2019 | Landsat    | Available                                                                        |

|    |            |            |                                                                                              |
|----|------------|------------|----------------------------------------------------------------------------------------------|
| 31 | 01/09/2019 | Sentinel 2 | Available                                                                                    |
| 32 | 13/09/2019 | Landsat    | Available but not calculated/ NDVI verified with NDGI for the period 12.08.2019 – 13.09.2019 |
| 33 | 16/09/2019 | Sentinel 2 | Available                                                                                    |

**Table S5.** Data collection of the NDVI and climate parameter values used for Pearson Correlation analyses and correlation coefficients

| Date of image | NDVI value | t2m     | tp      | evpt    | v10     |
|---------------|------------|---------|---------|---------|---------|
| 22/08/1977    | 0.065607   | no data | no data | no data | no data |
| 23/05/1984    | 0.191586   | 6.513   | 2.684   | -0.882  | 1.818   |
| 26/07/1984    | 0.381537   | 14.328  | 0.000   | -1.480  | -1.523  |
| 27/06/1985    | 0.503099   | 8.586   | 3.492   | -0.932  | -1.740  |
| 22/05/1986    | 0.283476   | 6.051   | 2.264   | -0.755  | -1.375  |
| 04/10/1986    | 0.358145   | 5.955   | 0.000   | -0.433  | -2.022  |
| 03/07/1987    | 0.45117    | 14.868  | 0.000   | -1.761  | -0.574  |
| 11/07/1990    | 0.46277    | 18.375  | 0.006   | -1.313  | 2.079   |
| 02/09/1992    | 0.479891   | 17.145  | 0.004   | -0.937  | -2.583  |
| 29/06/1994    | 0.450397   | 9.065   | 0.000   | -1.320  | -1.703  |
| 28/06/2000    | 0.329287   | 9.379   | 0.978   | -0.811  | -2.672  |
| 13/06/2009    | 0.519486   | 12.299  | 0.982   | -0.936  | 2.138   |
| 15/07/2009    | 0.582377   | 14.496  | 14.882  | -0.733  | -0.399  |
| 22/08/2011    | 0.464104   | 14.017  | 10.069  | -1.170  | -1.894  |
| 23/09/2011    | 0.5032     | 16.178  | 0.082   | -0.731  | -0.345  |
| 09/09/2012    | 0.479091   | 13.001  | 0.000   | -0.901  | 0.040   |
| 02/08/2016    | 0.539184   | 17.056  | 1.412   | -1.237  | -1.918  |
| 02/05/2017    | 0.231385   | 8.555   | 1.074   | -0.963  | -0.042  |
| 02/08/2017    | 0.786584   | 15.066  | 0.000   | -1.418  | -1.332  |
| 27/08/2017    | 0.753507   | 15.066  | 0.000   | -1.418  | -1.332  |
| 26/10/2017    | 0.469508   | 6.433   | 0.005   | -0.332  | -0.277  |
| 03/04/2018    | 0.158468   | 1.345   | 2.308   | -0.694  | -1.040  |
| 06/10/2018    | 0.478677   | 8.481   | 0.134   | -0.214  | 0.199   |
| 16/10/2018    | 0.537403   | 8.481   | 0.134   | -0.214  | 0.199   |
| 26/10/2018    | 0.560783   | 8.481   | 0.134   | -0.214  | 0.199   |
| 24/04/2019    | 0.289828   | 2.946   | 0.000   | -0.701  | -1.253  |
| 13/06/2019    | 0.618859   | 11.227  | 3.077   | -1.042  | -0.992  |
| 23/06/2019    | 0.548105   | 11.227  | 3.077   | -1.042  | -0.992  |
| 03/07/2019    | 0.689729   | 16.637  | 0.000   | -1.693  | -0.298  |

|                                                                            |          |              |               |               |                |
|----------------------------------------------------------------------------|----------|--------------|---------------|---------------|----------------|
| 12/08/2019                                                                 | 0.383913 | 15.477       | 2.888         | -1.188        | -1.675         |
| 01/09/2019                                                                 | 0.664057 | no data      | no data       | no data       | no data        |
| 13/09/2019                                                                 | 0.305227 | no data      | no data       | no data       | no data        |
| 16/09/2019                                                                 | 0.63779  | no data      | no data       | no data       | no data        |
| <b>Correlation coefficient<br/>between NDVI and climate<br/>parameter:</b> |          | <b>0.605</b> | <b>0.0228</b> | <b>-0.275</b> | <b>-0.0184</b> |

**Table S6.** Changes in t2m parameter values during the months May, June, July and August for the period 1979 – 2019 and 1979 – 2018 for September

| t2m<br>values,<br>°C | May<br>1979- 2019 |               | June<br>1979- 2019 |               | July<br>1979- 2019 |               | August<br>1979- 2019 |               | September<br>1979- 2018 |               |
|----------------------|-------------------|---------------|--------------------|---------------|--------------------|---------------|----------------------|---------------|-------------------------|---------------|
|                      | 1979-<br>1999     | 1999-<br>2019 | 1979-<br>1999      | 1999-<br>2019 | 1979-<br>1999      | 1999-<br>2019 | 1979-<br>1999        | 1999-<br>2019 | 1979-<br>1999           | 1999-<br>2019 |
| Mean                 | 6.3               | 8.5           | 10.4               | 11.5          | 13.8               | 14.7          | 15.9                 | 15.3          | 12.5                    | 13.7          |
| Min.                 | 2.3               | 3.8           | 4.9                | 7.5           | 8.8                | 10.2          | 12.8                 | 12.7          | 7.6                     | 8.3           |
| Max.                 | 13.8              | 14.6          | 14.8               | 16.2          | 18.4               | 23.6          | 19.9                 | 18.9          | 17.2                    | 17.7          |

### 3. Data analysis: single data sources

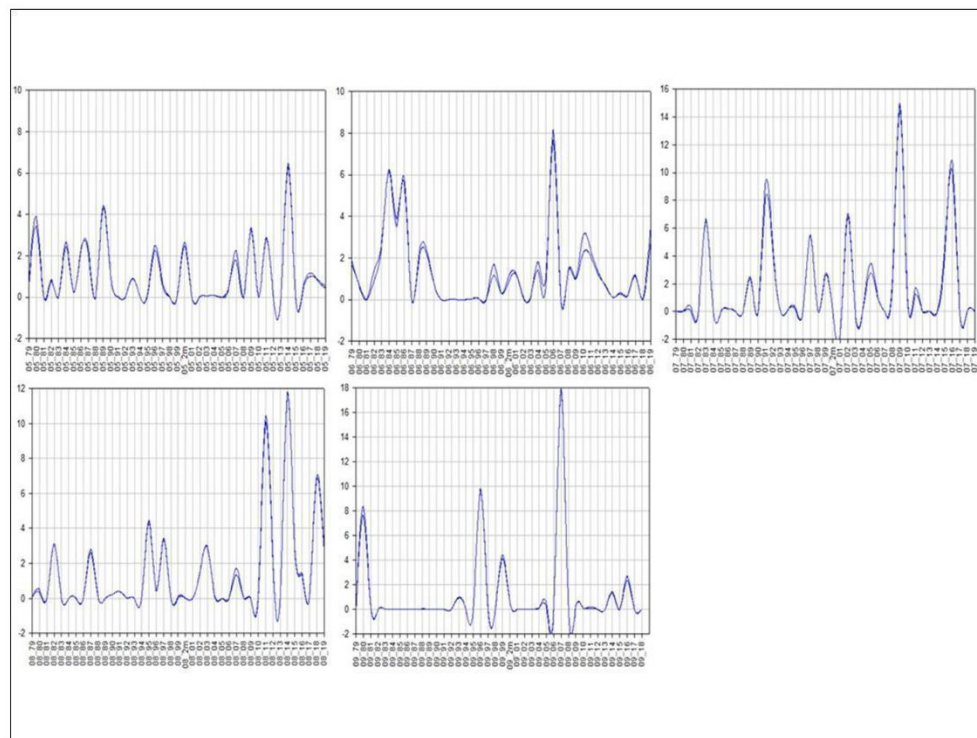

**Figure S1.** Long-term trends in tp parameter during the vegetation season: a) May; b) June; c) July; d) August, and e) September

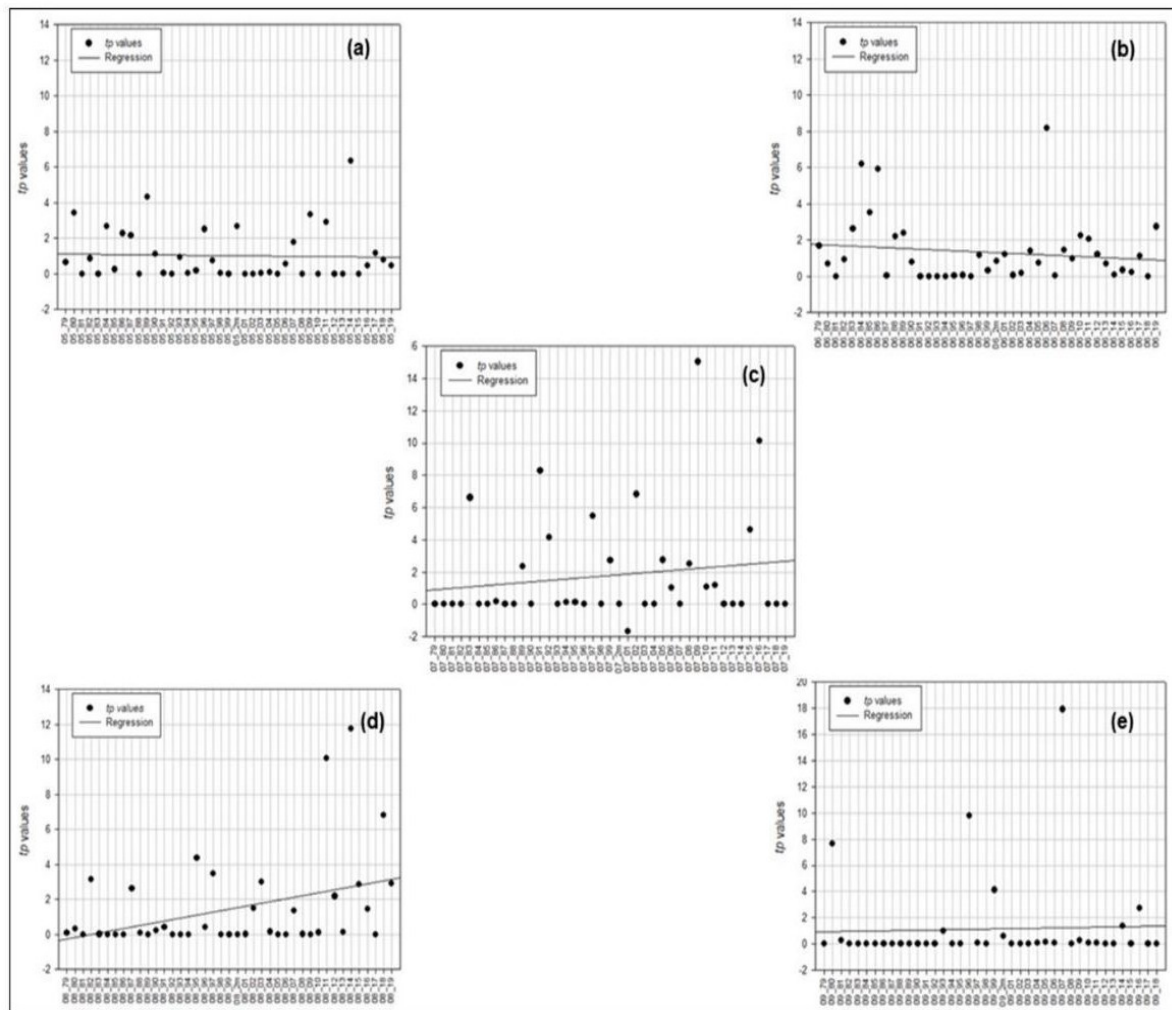

**Figure S2.** Long-term linear regression trends of tp by month: a) May; b) June; c) July; d) August, and e) September



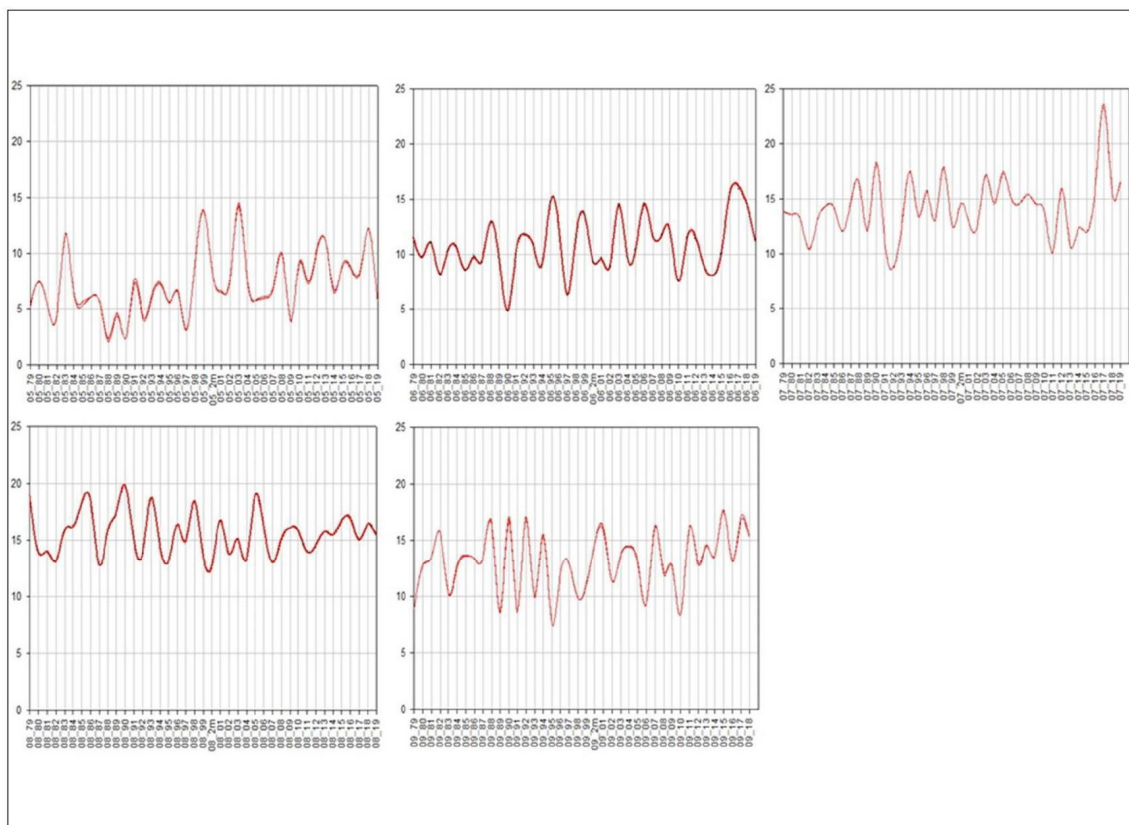

**Figure S3.** Long-term trends in monthly temperatures in the active vegetation months (May to September)

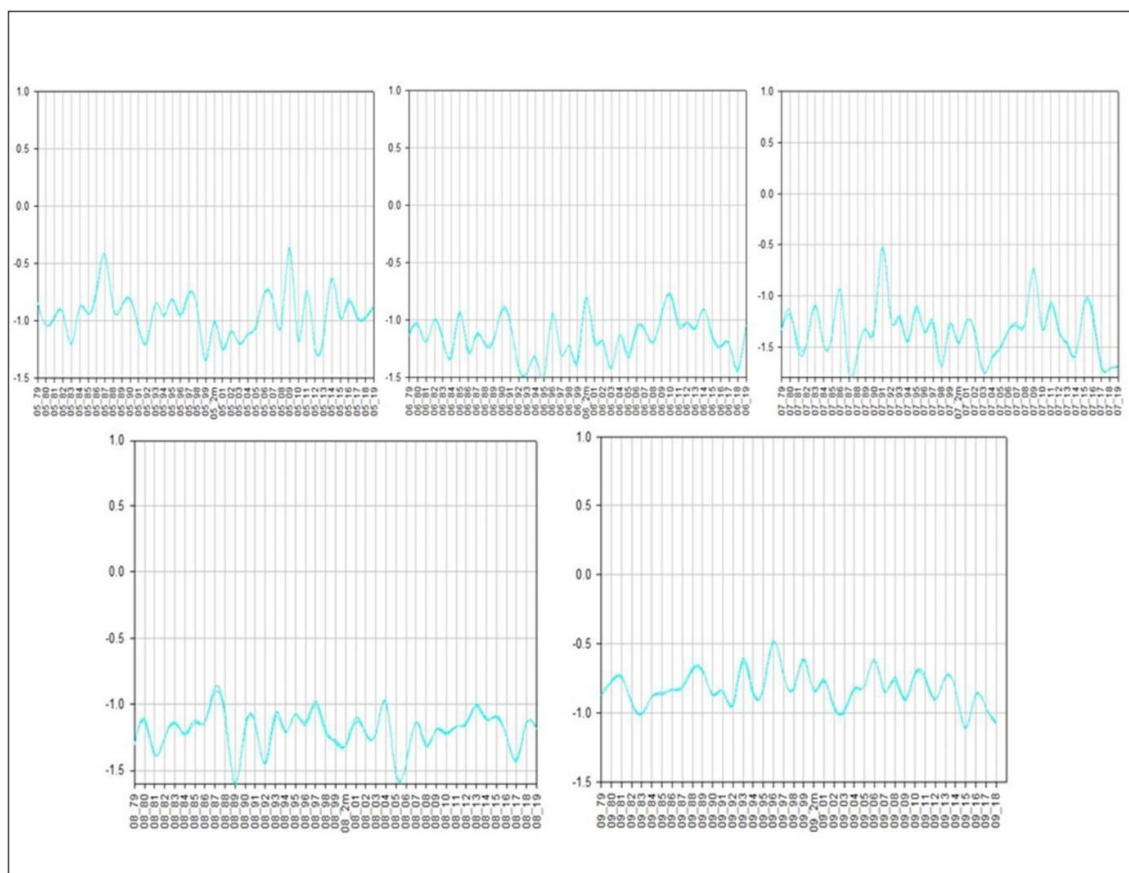

**Figure S4.** Graph of evpt by month: a) May; b) June; c) July; d) August, and e) September

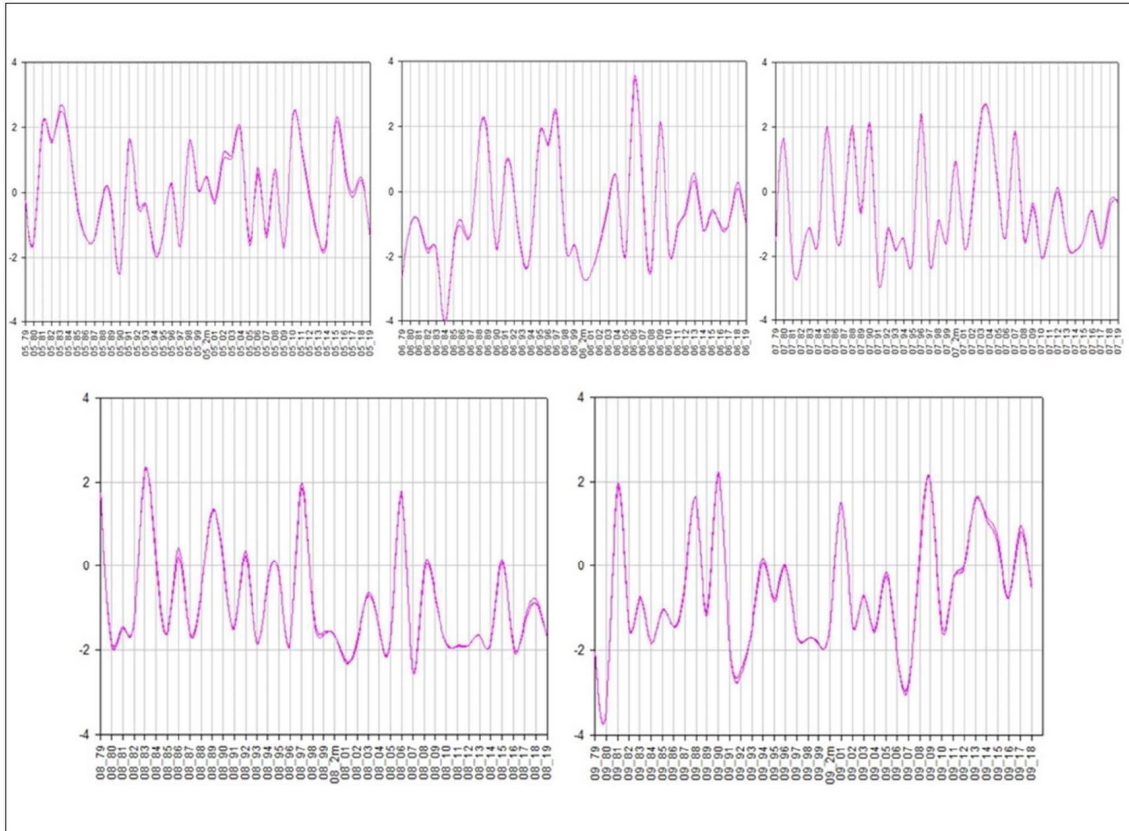

Figure S5. Long-term graph of v10 by month: a) May; b) June; c) July; d) August, and e) September

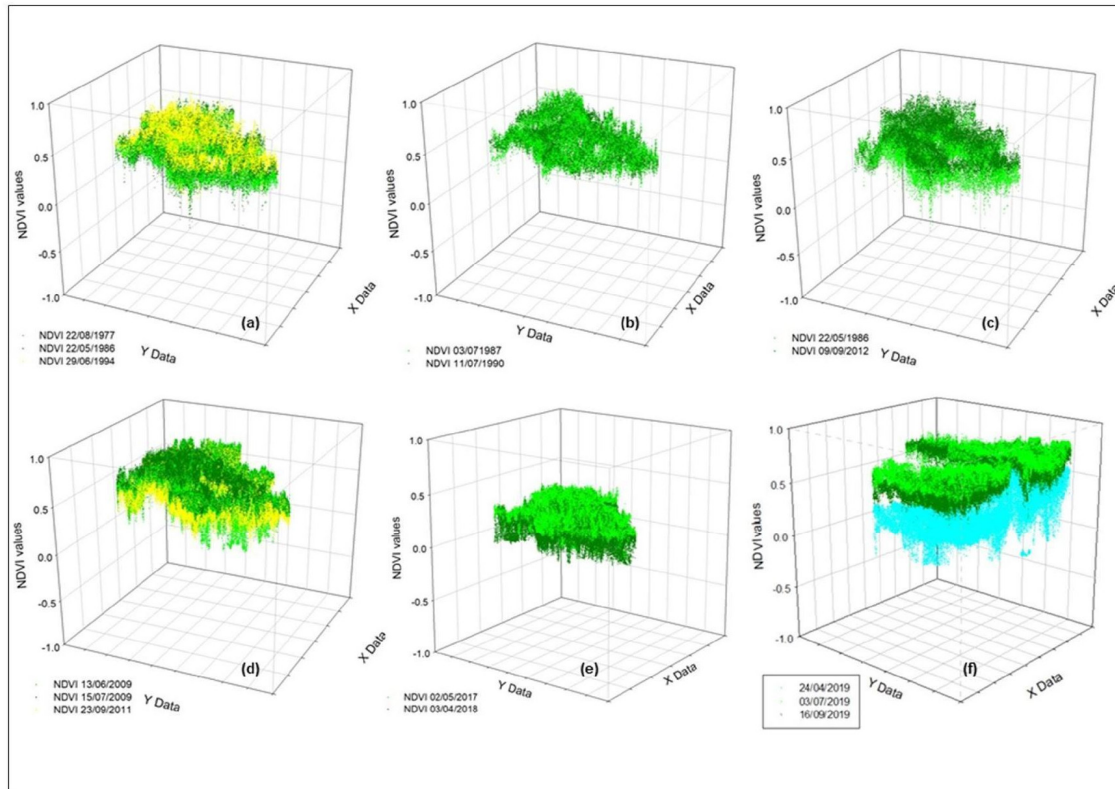

Figure S6. 3D graphics of the NDVI values for the period 1977 – 2019: a, b – in the beginning; c, d – in the middle; e, f – in the end of the period

## 4. Data analysis: combining satellite and climate data

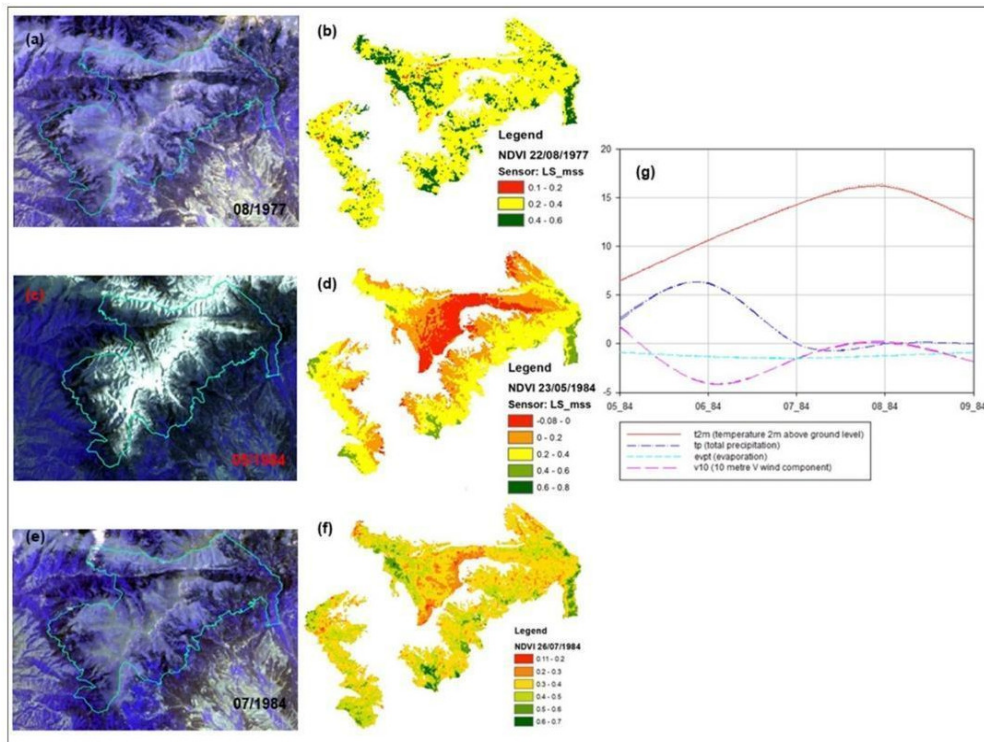

**Figure S7.** Data collection for vegetation periods in 1977 and 1984: (a, c, e) – satellite images; (b, d, f) – TM of NDVI: (b) The NDVI values were above 0 all over the study area and the advanced vegetation phase (i.e. leaf biomass production), which suggests overall good functionality of the HME; (g) – diagram of climate parameters dynamics. Due to the lack of t2m data, for 1977 we only show NDVI data

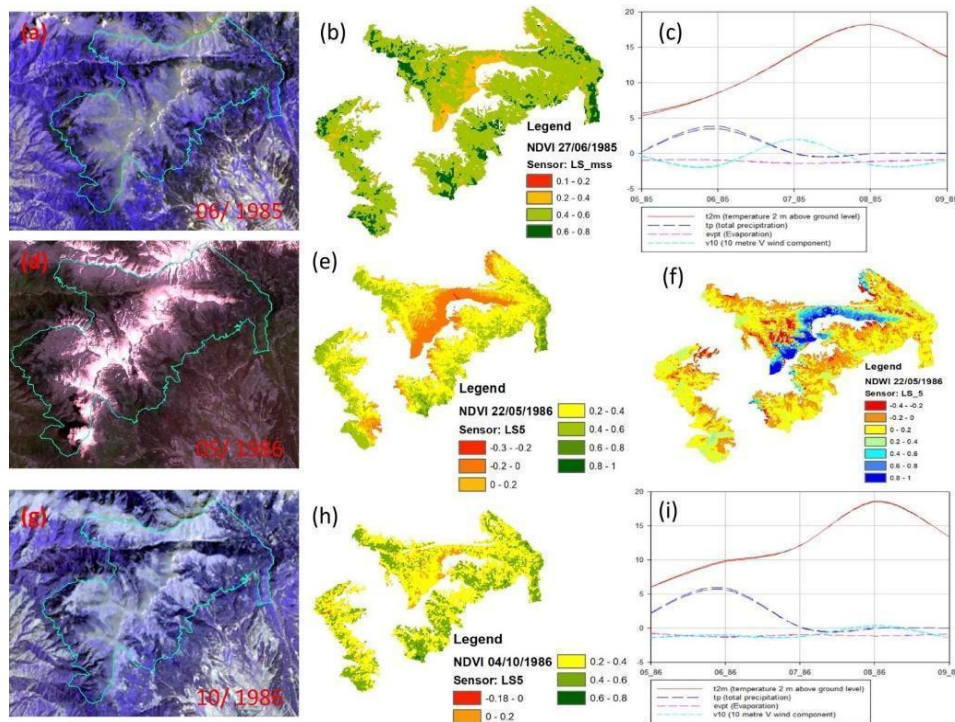

**Figure S8.** Data collection for vegetation period in 1985 and 1986: (a, d, g) – satellite images; (b, e, h) – TM of NDVI; (f) – TM of NDWI; (c, i) – diagrams of climate parameters dynamics



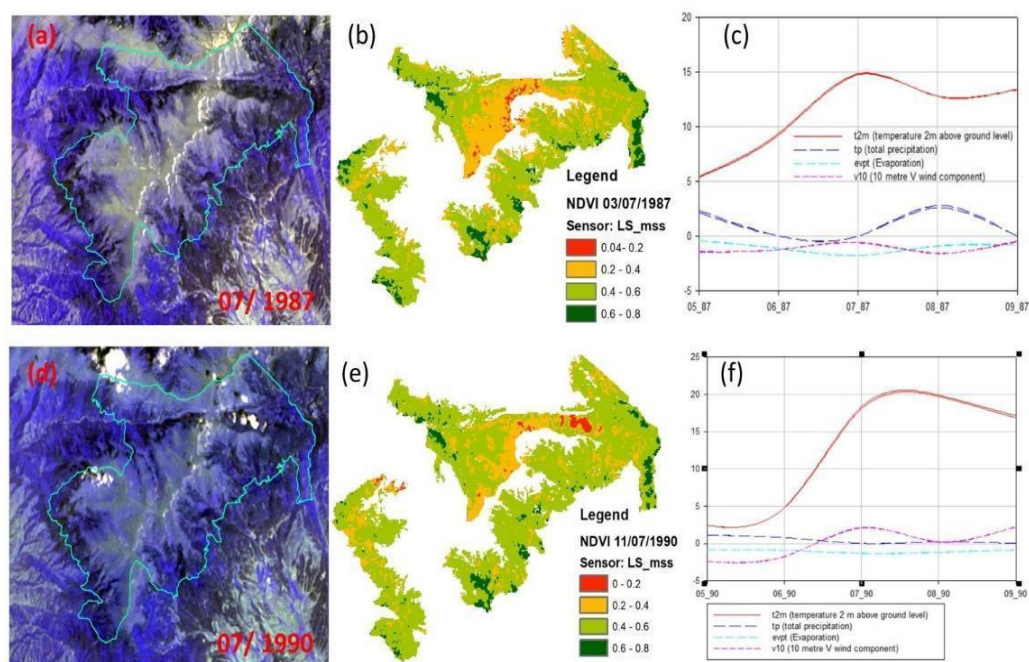

Figure S9. Data collection for vegetation periods in 1987 and 1990: (a, d) – satellite images; (b, e) – TM of NDVI; (c, f) – diagrams of climate parameters dynamics

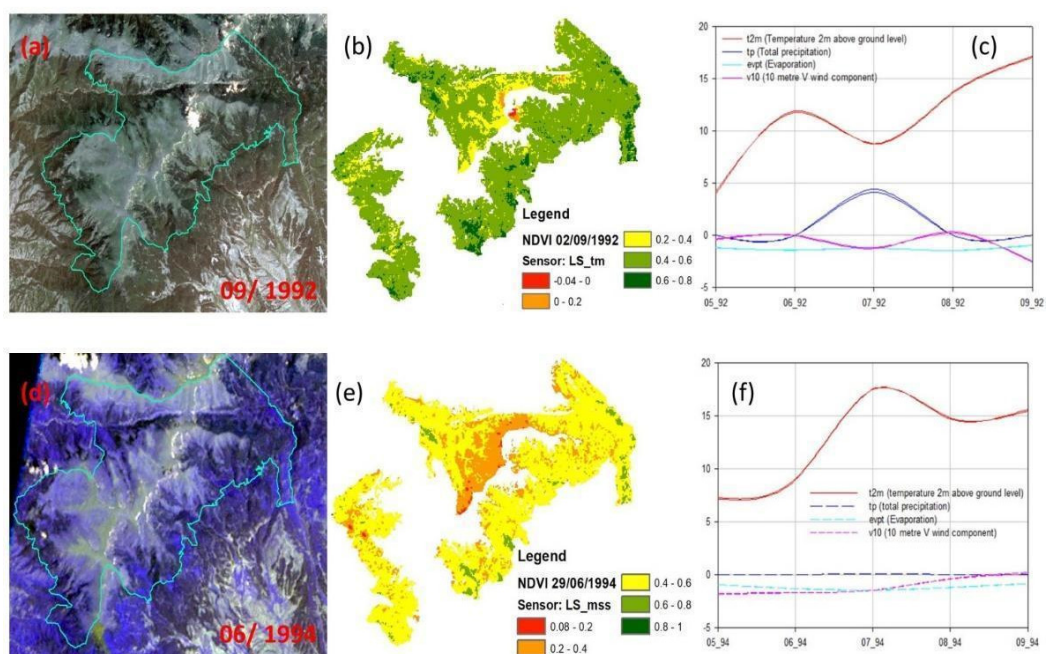

Figure S10. Data collection for vegetation periods in 1992 and 1994: (a, d) – satellite images; (b, e) – TM of NDVI; (c, f) – diagrams of climate parameters dynamics

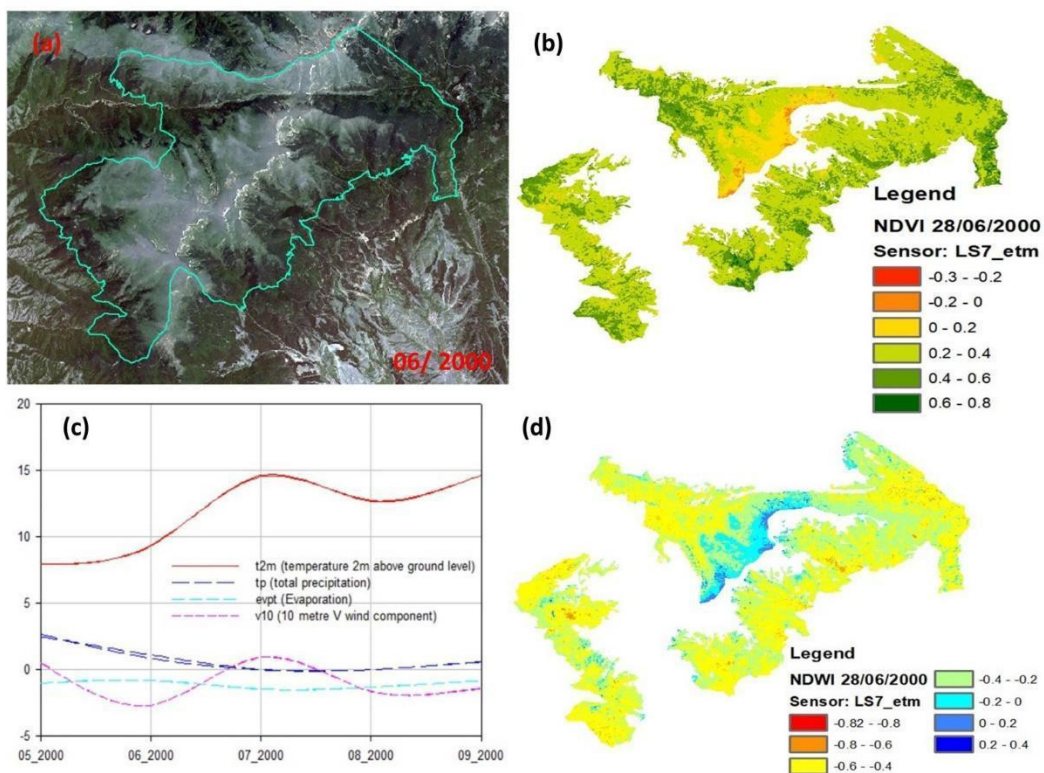

**Figure S11.** Data collection for vegetation period in 2000: (a) – satellite image; (b) – TM of NDVI; (c) – diagram of climate parameters dynamics; (d) – TM of NDWI

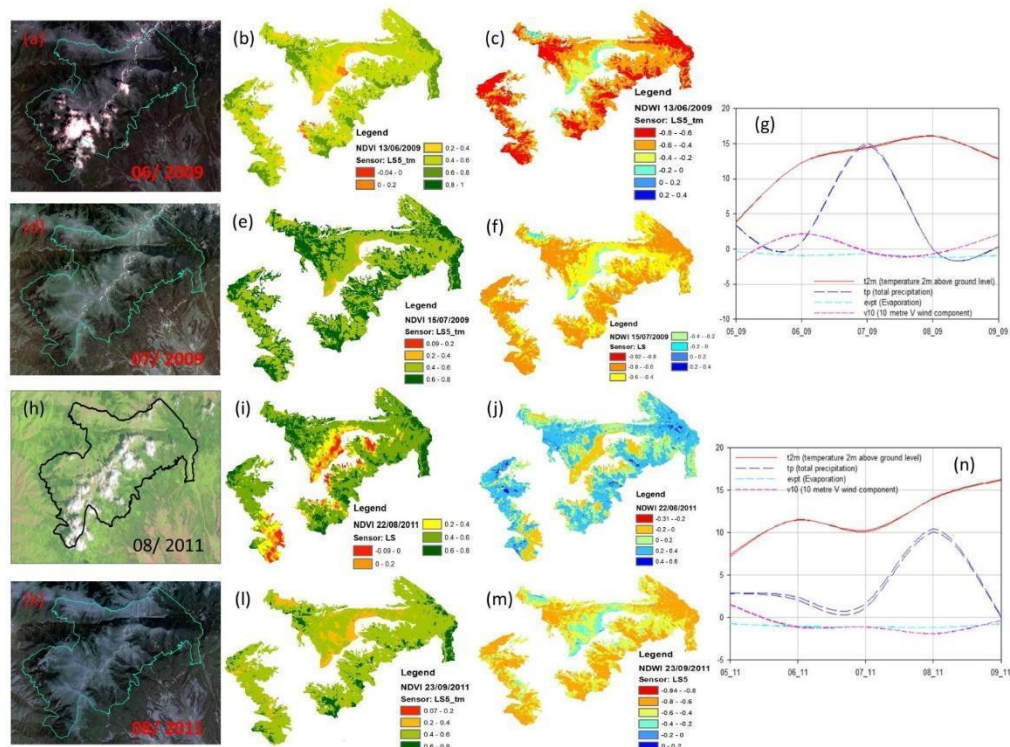

**Figure S12.** Data collection for vegetation periods in 2009 and 2011: (a, d, h, k) – satellite images; (b, e, i, l) – TM of NDVI; (c, f, j, m) – TM of NDWI; (g, n) – diagrams of climate parameters dynamics



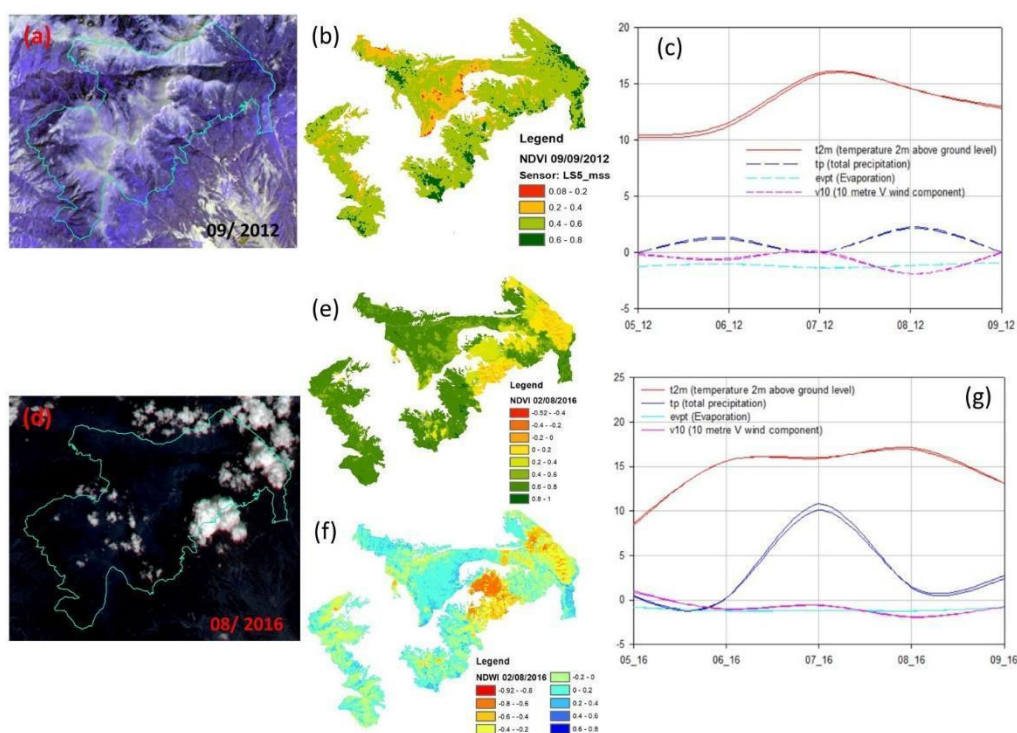

**Figure S13.** Data collection for vegetation periods in 2012 and 2016: (a, d) – satellite images; (b, e) – TM of NDVI; (f) – TM of NDWI; (c, g) – diagrams of climate parameters dynamics

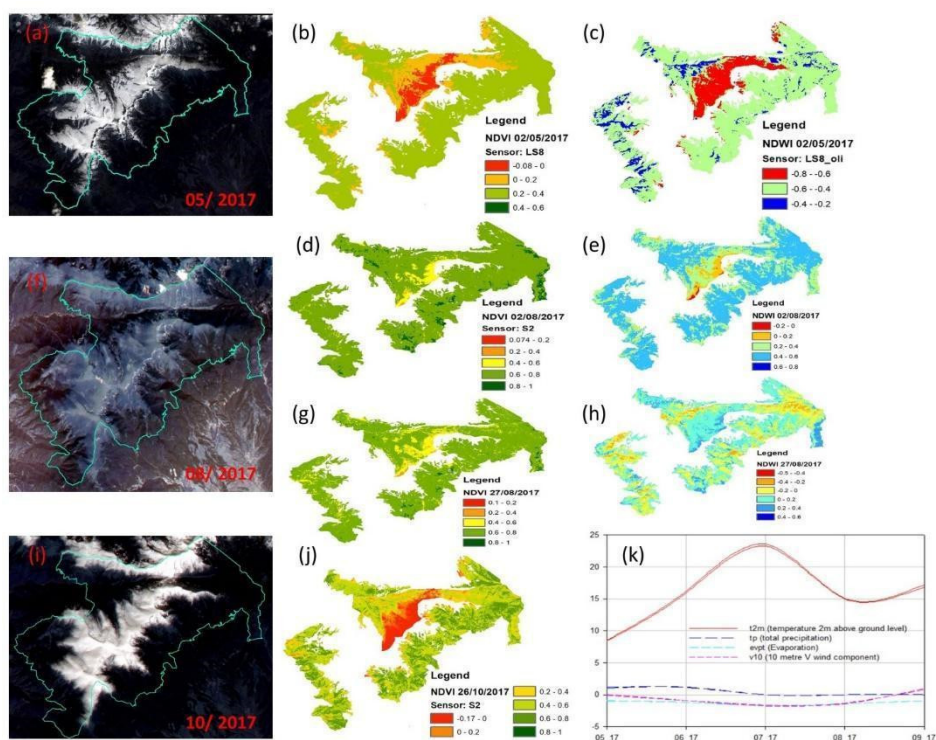

**Figure S14.** Data collection for vegetation period in 2017: (a, f, i) – satellite images; (b, d, g, j) – TM of NDVI; (c, e, h) – TM of NDWI; (k) – diagram of climate parameters dynamics

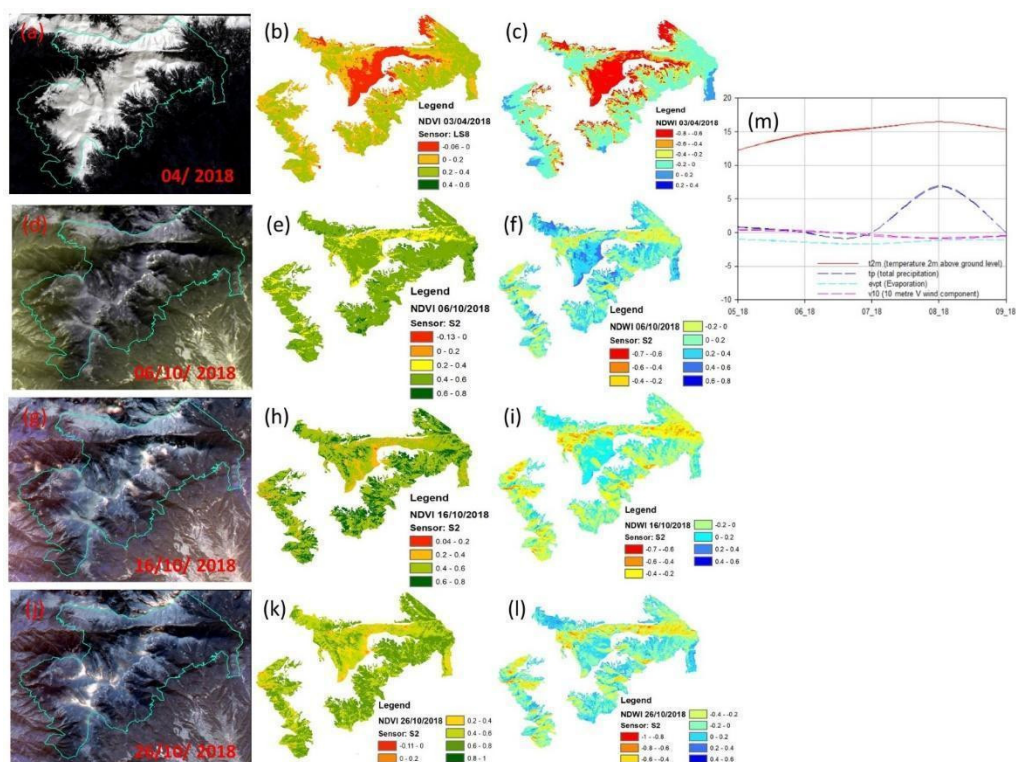

Figure S15. Data collection for vegetation period in 2018: (a, d, g, j) – satellite images; (b, e, h, k) – TM of NDVI; (c, f, i, l) – TM of NDWI; (m) - diagram of climate parameters dynamics

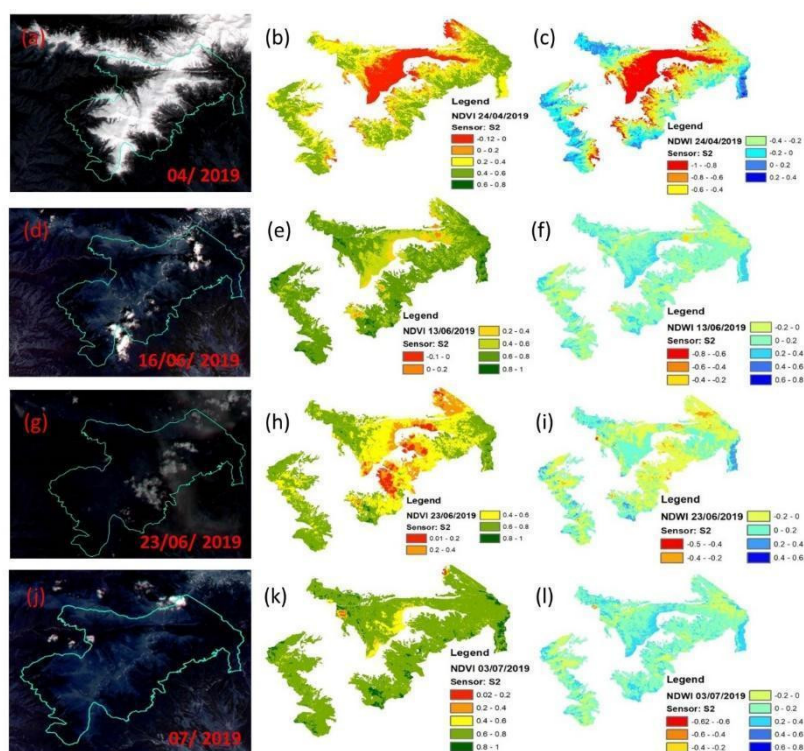

Figure S16. Data collection for vegetation period in 2019- part 1: (a, d, g, j) – satellite images; (b, e, h, k) – TM of NDVI; (c, f, i, l) – TM of NDWI



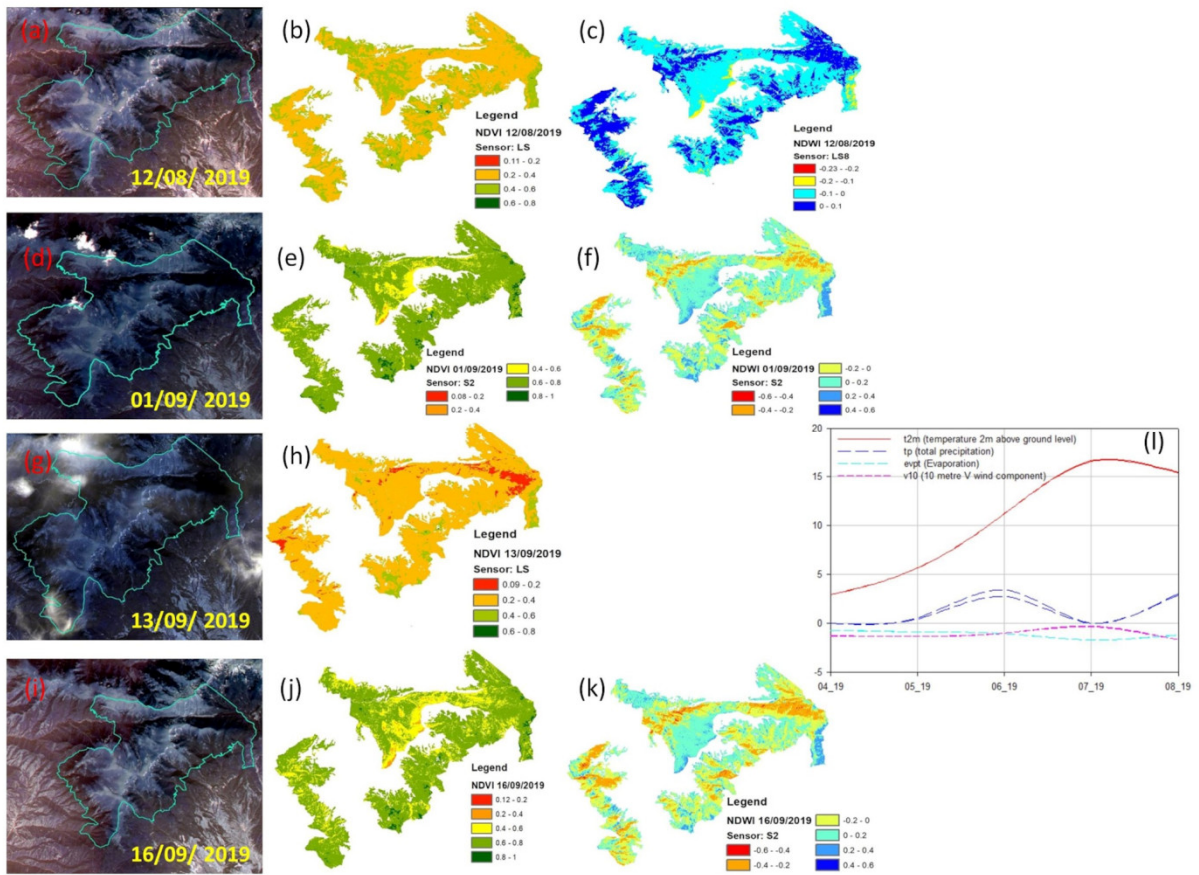

**Figure S17.** Data collection for vegetation period in 2019- part 2: (a, d, g, i) – satellite images; (b, e, h, j)- TM of NDVI; (c, f, k) – TM of NDWI and diagram of climate parameters dynamics (l)



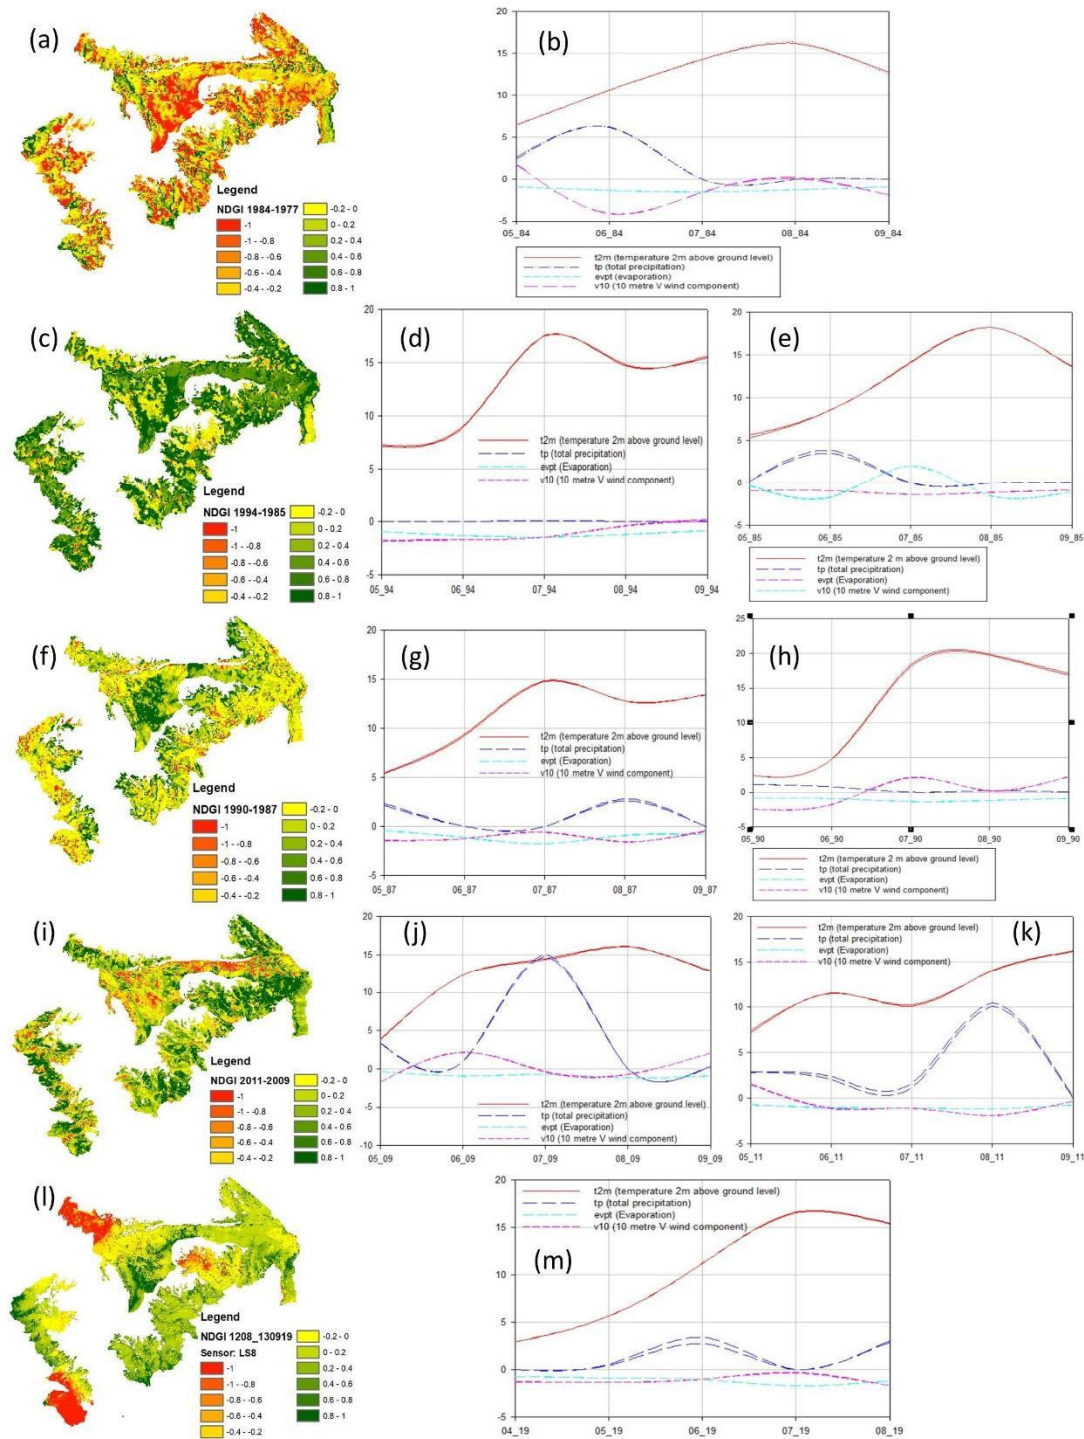

**Figure S18.** Relation between NDGI and the respective climate conditions: (a) TM of NDGI between 22/08/1977 and 23/05/1984; (c) TM of NDGI between 03/07/1987 and 11/07/1990; (f) TM of NDGI between 27/06/1985 and 29/06/1994 (i) TM of NDGI between 13/06/2009 and 23/09/2011; (l) TM of NDGI between 12/08/2019 and 13/09/2019; (b, d, e, g, h, j, k, m) – diagrams of climate parameter dynamics for 1984, 1987, 1990, 1985, 1994, 2009, 2011 and 2019, respectively

## 5. Data cross-validation: NDGI as means to identify outliers

This section describes the analytical steps for using a more sensitive vegetation index – NDGI – as a means to identify outliers.

As revealed in Figure S 17, there seems to be a double peak in vegetation growth in September 2019 – active growth indication on 01/09 and 16/09 while the growth seems to have stalled in the image taken

on 13/09. Considering there ought to be a time lag between rainfall and actual robust vegetation growth, this image sequence can be interpreted either as a sharp resurgence in growth after a dip in mid-September (caused by an earlier dip in rainfall in June), or as a flawed image, possibly due to mist whose extent was not correctly detected during cloud filtering. Since the NDWI for 11/09/2019 cannot be derived due to sensor limitations, we looked at NDGI to verify the possible extent of atmospheric distortion in the image quality. The NDGI image (Figure 8e) shows an even bigger extent of distortion in apparent growth patterns (indicated by anomalous values at or close to -1) than the visual inspection of cloud cover (Figure S 17g). In the NDGI, there's a much smoother transition from cloud covered areas to areas with apparent high vegetation growth than what would be manifest in case of single distinct cloud shadows. Thus, we found a strong indication of mist distorting the satellite scene taken on 13/09/2019, which causes a high uncertainty in its NDVI data. For this reason, we discarded the NDGI TM for the difference between 12/08 and 13/09/2019 from the further statistical analysis.
